# Supplementary material
Source: PubMed Central journal article supplement (PMC5711496)

## Supplementary Figure S1. Identification of TG in LC-ESI MS/MS

(A) Neutral loss scan for TG containing palmitic acid, DHA, and DPA.

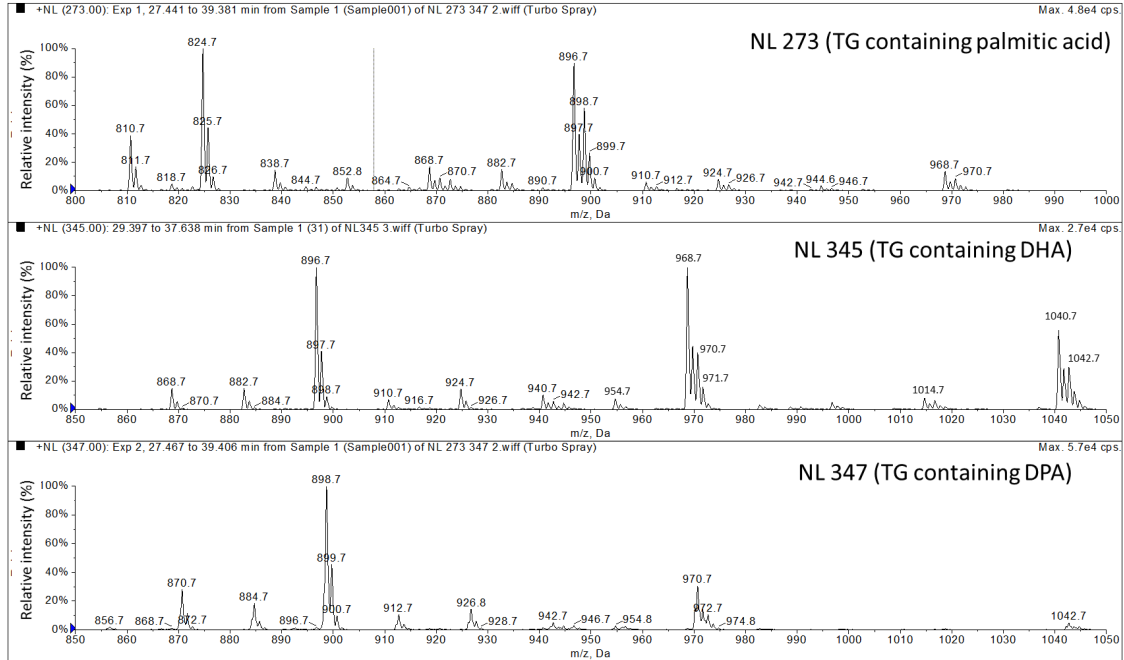

(B) Positive Q1 and MS/MS analysis.

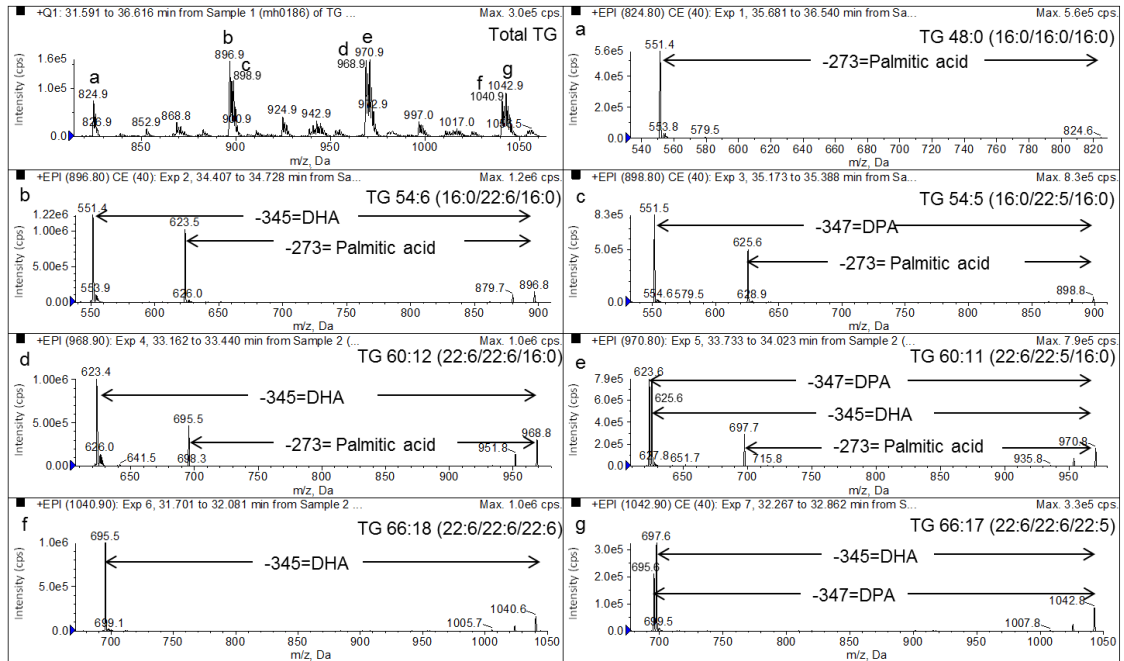

Supplement: 10.1194_M079897_jlr.M079897-1.pdf [file 10.1194_M079897_jlr.M079897-1.pdf]
