# Supplementary material
Source: PubMed Central journal article supplement (PMC5711496)

## Supplementary Figure S2. Identification of DG in LC-ESI MS/MS

(A) Neutral loss scan for DG containing palmitic acid, DHA, and DPA.

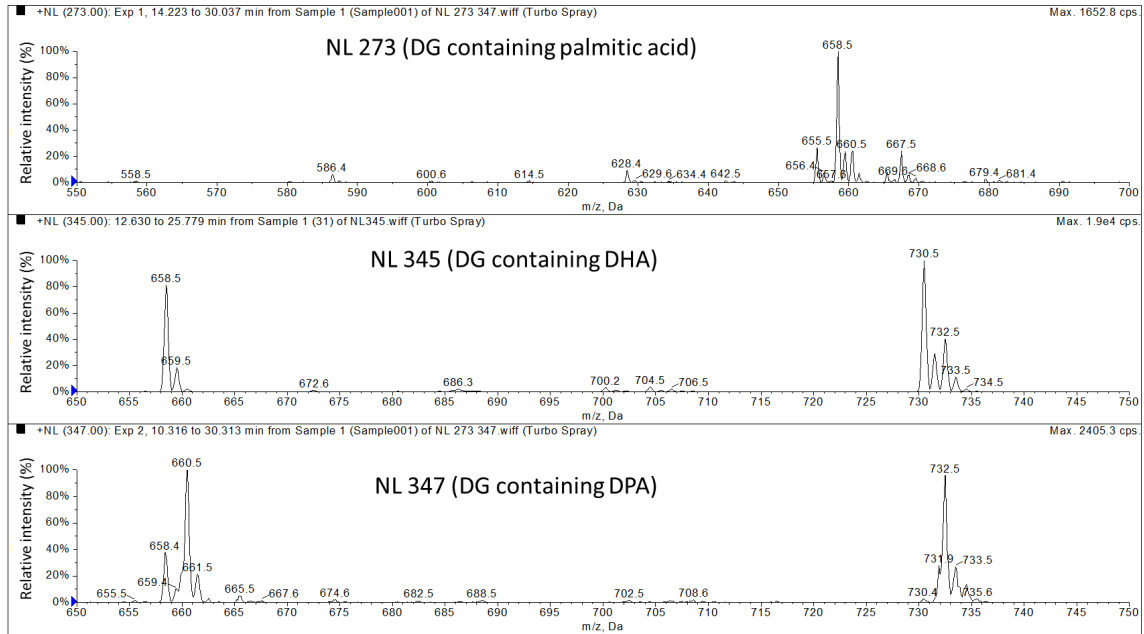

(B) MS/MS analysis for DG

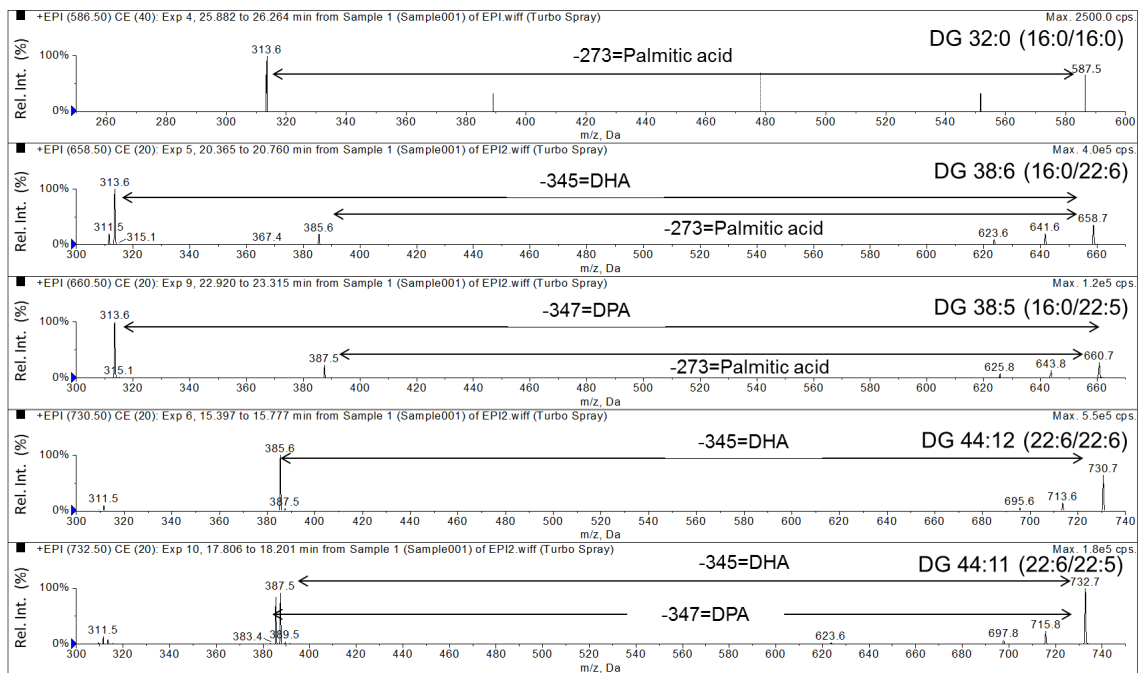

Supplement: 10.1194_M079897_jlr.M079897-2.pdf [file 10.1194_M079897_jlr.M079897-2.pdf]
