# Supplementary material
Source: PubMed Central journal article supplement (PMC5711496)

**Supplementary Figure S3. Identification of phospholipids in LC-ESI MS/MS**

(A) Precursor ion scan at  $m/z$  184, corresponding to phosphocholine head group, and MS/MS analysis for PC identification

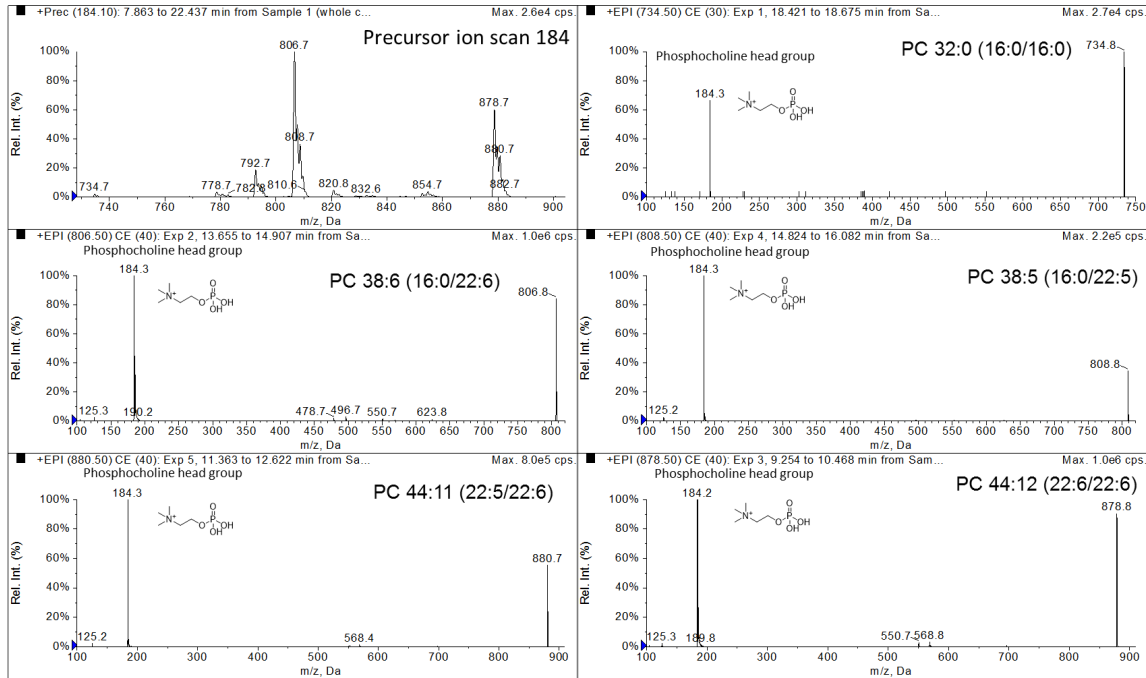

(B) Neutral loss scan at  $m/z$  141, corresponding to phosphoethanolamine head group, and MS/MS analysis for PE identification.

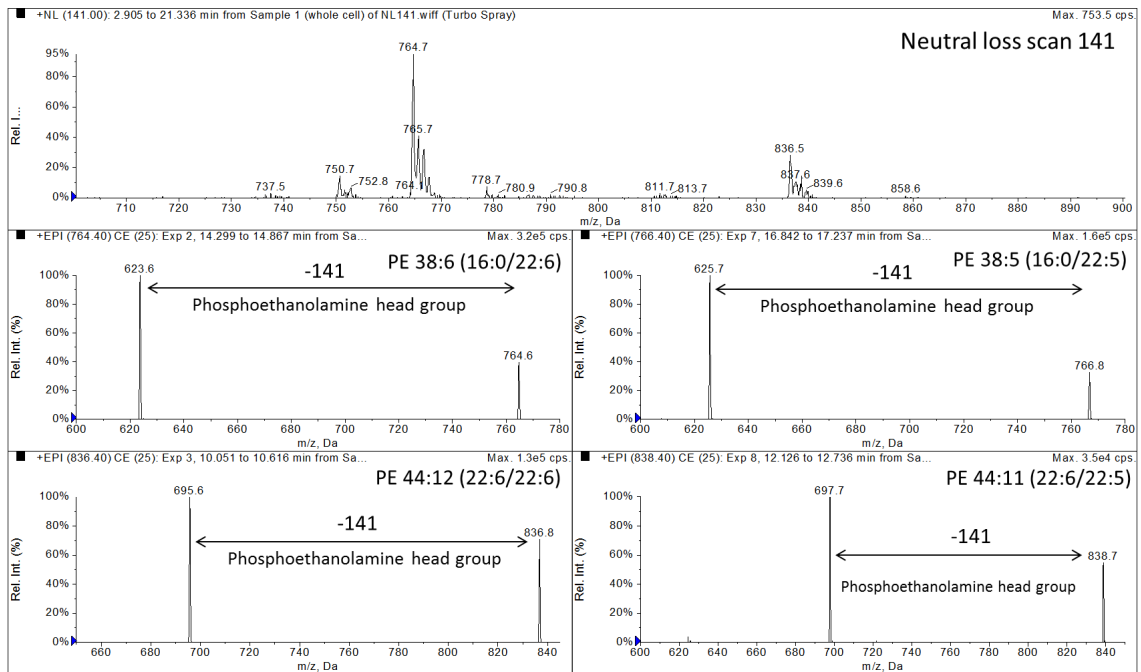

Supplement: 10.1194_M079897_jlr.M079897-3.pdf [file 10.1194_M079897_jlr.M079897-3.pdf]
