# Supplementary material
Source: PubMed Central journal article supplement (PMC5711496)
Supplement: 10.1194_M079897_jlr.M079897-4.pdf [file 10.1194_M079897_jlr.M079897-4.pdf]

**Supplementary Table S1 Oligonucleotide primers used in this study**

| Oligonucleotide                                                                    | Sequence (5'-3')                                                                                                                                                                                                | Purpose                            |
|------------------------------------------------------------------------------------|-----------------------------------------------------------------------------------------------------------------------------------------------------------------------------------------------------------------|------------------------------------|
| ADRP-F<br>ADRP-R                                                                   | ATGCCTGCCGCAAGACCATGCAAG<br>GTAGGTCTCATCGACATCCTCGTCC                                                                                                                                                           | Cloning of TLDP1                   |
| EcoRI-LDRP-F<br>LDRP-PstI-R                                                        | TAAGAATTCATGCCTGCCGCAAG<br>TAACTGCAGGTAGGTCTCATCGACA                                                                                                                                                            | Recombinant protein<br>of TLDP1    |
| EF1-BamHI R<br>FusionR<br>FusionF<br>Bgl2-UbiP F<br>EFUbi556F<br>EFUbi5396R        | CATGGATCCCGAAAGACGGGCCGTAAGGAC<br>CTTGGCGGCAGGCATCTTGTACAGCTCGTCCAT<br>GAGCTGTACAAGATGCCTGCCGCAAGACC<br>CATAGATCTGAGAGCGTTTGCTTCGAGCCGC<br>GAAGGTGAAGTCGTAACAAGGTTT<br>GGAAACAGCTATGACATGATTACG                 | GFP fusion protein                 |
| ADRP-BglII-F<br>ADRP-BglII-R                                                       | GCGTAGAAGATCTTCAGGCCATCGAGC<br>GCGTAGAAGATCTTCTGGCCACCTTGG                                                                                                                                                      | Addition of BglII<br>site to TLDP1 |
| KO-5'-F<br>KO-5'-R<br>KO-3'-R                                                      | AAG AGA TCT TGA GGC TCG GTG GG<br>CGC AAA TCT CCG TCT ACT GTC TG<br>CCC GTC GAA CTT TTA TTT CAA GGC                                                                                                             | Screening and<br>Southern blotting |
| YI-1<br>YI-2<br>5178F                                                              | GCAACACTAGCCAACATGGATTACAAGGATGAC<br>GATGACAAGATGCCTGCCGCAAGACC<br>ACAGATAGCTTAGTTTTAGTAGGTCTCATCGAC<br>CTGTGTCACGCGTCCACTT                                                                                     | Expression of FLAG<br>fused TLDP1  |
| FASf2<br>FASr2<br>Pusf<br>Pusr<br>realtime2AF<br>realtime2AR<br>GAPDH2F<br>GAPDH2R | GAACGAAATCATGGGCGAA<br>GGGCAAAGCAGCAGAAAG<br>GGGTATTGACTTCCAGAACAAGAGC<br>GATGTCGTA CTCCAGGGTCTCG<br>GGTAACTTCGCAACTGATTCCAC<br>CAGAGACCCATATACAGCAGAAGC<br>TACGAGGAGATCAAGAAGGTCCTC<br>TTAAGCATGATACCGGCGTCAGC | Real-time PCR                      |
