# Supplementary material
Source: PubMed Central journal article supplement (PMC5711496)
Supplement: 10.1194_M079897_jlr.M079897-5.pdf [file 10.1194_M079897_jlr.M079897-5.pdf]

**Supplementary Table S2. MRM pairs of PC, PE, DG, and TG in LC-ESI MS**

| Molecular species        | Q1     | Q3    |
|--------------------------|--------|-------|
| PC22:0 (11:0/11:0)       | 594.4  | 184.1 |
| PC32:0 (16:0/16:0)       | 734.5  | 184.1 |
| PC38:6 (16:0/22:6)       | 806.5  | 184.1 |
| PC38:5(16:0/22:5)        | 808.5  | 184.1 |
| PC44:12 (22:6/22:6)      | 878.5  | 184.1 |
| PC44:11 (22:5/22:6)      | 880.5  | 184.1 |
| PE24:0 (12:0/12:0)       | 580.4  | 439.4 |
| PE38:6 (16:0/22:6)       | 764.4  | 623.4 |
| PE38:5 (16:0/22:5)       | 766.4  | 625.4 |
| PE44:12 (22:6/22:6)      | 836.4  | 695.4 |
| PE44:11 (22:5/22:6)      | 838.4  | 697.4 |
| DG24:0 (12:0/12:0)       | 474.4  | 257.2 |
| DG32:0 (16:0/16:0)       | 586.5  | 313.5 |
| DG38:6 (16:0/22:6)       | 658.5  | 313.5 |
| DG38:5 (16:0/22:5)       | 660.5  | 313.5 |
| DG44:12 (22:6/22:6)      | 730.5  | 385.5 |
| DG44:11 (22:6/22:5)      | 732.5  | 387.5 |
| TG36:0 (12:0/12:0/12:0)  | 656.5  | 439.4 |
| TG48:0 (16:0/16:0/16:0)  | 824.5  | 551.5 |
| TG54:6 (16:0/22:6/16:0)  | 896.5  | 623.5 |
| TG54:5 (16:0/22:5/16:0)  | 898.5  | 625.5 |
| TG60:12 (22:6/22:6/16:0) | 968.5  | 623.5 |
| TG60:11 (22:6/22:5/16:0) | 994.5  | 647.5 |
| TG66:18 (22:6/22:6/22:6) | 1040.5 | 695.5 |
| TG66:17 (22:6/22:5/22:6) | 1042.5 | 697.5 |
